# Supplementary material for: Conversion of ER, PR, HER2 and Ki-67 and Prognosis in breast cancer metastases to the brain
Source: Front Neurol. 2022 Oct 24;13:1002173. doi: 10.3389/fneur.2022.1002173 (PMC9637832; doi:10.3389/fneur.2022.1002173)
Supplement: Supplementary file 1 [file Table_1.XLSX]

## Sheet: 类型转换
BC确诊年龄（岁）	BC确诊日期	BC复发日期	DFS（月）	确诊脑转移日期	诊断BC至脑转移时间（月） （计算）	BC复发至脑转移时间（月） （计算）	OS 诊断BC至死亡时间（月） （计算）	确诊脑转移至死亡（天）	确诊脑转移至死亡（月）	死亡日期 （计算）	确诊脑转移时的年龄（岁） 参考	复发至脑转移时间（月） 参考	OS状态 画图版 1--死亡 0--存活	OS状态 0-死亡 1-存活	病理类型 1-浸润性导管癌 2-浸润性癌 3-浸润性小叶癌	原发灶ER 1-阳性 0-阴性 3-未知	原发灶PR 1-阳性 0-阴性 3-未知	原发灶HER2 1阳性 2阴性 3未知	初诊Ki67（%）	初诊分子亚型 1-luminalA 2-luminalB （HER2阴性） 3-HER2阳 4-TNBC	脑转移灶ER 1--阳性 2--阴性	脑转移灶PR 1--阳性 2--阴性	脑转移灶HER2 1--阳性 2--阴性	脑转移灶ki-67	脑转移灶类型 1--LUMINAL型 2--HER2阳型 3--三阴型	乳腺癌总体类型 1--类型转换 0--类型未转换	任一受体总情况 1--不一致 0--一致	HER2阳性脑转移是否抗HER2治疗 1-是 2-否 3-非HER2阳	ER 1--不一致 0--一致	ER 1--阳转阴 2--阴壮阳	PR 1--不一致 0--一致	PR 1--阳转阴 2阴壮阳	HR 0--一致 1--不一致	HER-2 1--不一致 0--一致	HER-2 1--阳转阴 2--阴壮阳
45	1998-01-01	2019-01-01	252	2019-01-01	252	0	277	1035	34.5	2021-11-01	66	0	0	1	1	1	0	2	10	1	1	2	2	10%	1	0	0	3	0		0		0	0
60	2016-03-01	2017-11-01	15	2017-11-01	20	0	59	1188	39.6	2021-02-01	61.25	0	1	0	1	0	1	1	30	3	1	2	1	40%	2	0	1	1	1	2	1	1	1	0
56	2017-07-01	2019-01-01	17	2019-01-01	18	0	52	1035	34.5	2021-11-01	57.4167	0	0	1	1	1	1	1	40	3	1	2	2	60%	1	1	1	1	0		1	1	1	1	1
41	2012-05-25	2015-12-01	42	2016-12-01	54	12	84	912	30.4	2019-06-01	45.5833	12	1	0	1	1	1	1	35	3	2	2	1	30%	2	0	1	1	1	1	1	1	1	0
27	2014-12-01	2017-09-01	33	2017-09-01	33	0	83	1522	50.7333	2021-11-01	30	0	0	1	1	0	1	2	50	2	1	1	1	未知	2	1	1	1	1	2	0		1	1	2
64	2021-09-07	2021-09-07	0	2021-08-05	0	0	2	88	2.93333	2021-11	64	0	0	1	2	1	1	2	15	1	1	1	1	35%	2	1	1	1	0		0		0	1	2
41	2017-12-01	2019-05-01	17	2019-05-01	17	0	29	366	12.2	2020-05-01	42.4167	0	1	0	2	0	0	1	60	3	2	2	1	未知	2	0	0	1	0		0		0	0
45	2013-01-01	2016-09-01	43	2016-09-01	44	0	93	1491	49.7	2020-10-01	48.5833	0	1	0	1	0	0	1	10	3	1	2	1	20%	2	0	1	1	1	2	0		1	0
35	2011-12-01	2013-12-01	24	2017-10-01	70	46	72	61	2.03333	2017-12-01	39.0833	46	1	0	1	1	0	2	25	2	2	2	2	40%	3	1	1	3	1	1	0		1	0
53	2012-06-01	2013-09-01	14	2013-09-01	15	0	26	334	11.1333	2014-08-01	54.25	0	1	0	1	0	0	2	10	4	2	2	2	40%	3	0	0	3	0		0		0	0
50	2020-04-01	2020-12-01	8	2020-12-01	8	0	19	335	11.1667	2021-11-01	50	0	0	1	1	0	0	2	85	2	2	2	2	40%-50%	3	1	0	3	0		0		0	0
31	2017-09-01	2019-03-01	18	2020-02-01	29	11	50	639	21.3	2021-11-01	33	11	0	1	1	0	0	2	80	4	1	2	2	40%	1	1	1	3	1	2	0		1	0
46	2010-12-01	2011-09-01	8	2011-12-01	12	3	54	1278	42.6	2015-06-01	47	3	1	0	1	0	0	2	30	4	2	2	2	未知	3	0	0	3	0		0		0	0
52	2007-11-01	2010-05-01	30	2010-05-01	30	0	59	884	29.4667	2012-10-01	54.5	0	1	0	1	0	0	1	15	3	2	2	1	未知	2	0	0	1	0		0		0	0
50	2015-07-20	2017-08-01	24	2019-05-01	45	21	60	458	15.2667	2020-08-01	53.8333	21	1	0	1	0	0	1	35	3	2	2	1	35%	2	0	0	1	0		0		0	0
44	2017-06-05	2018-07-19	13	2019-11-01	28	15	53	731	24.3667	2021-11-01	46.4167	16	0	1	1	0	0	2	70	4	2	2	2	80%	3	0	0	3	0		0		0	0
37	2020-10-29	2021-04-27	5	2021-04-27	5	0	13	188	6.26667	2021-11-01	37	0	0	1	2	0	0	2	70	4	2	2	2	60%	3	0	0	3	0		0		0	0
35	2019-08-29	2019-08-29	0	2021-03-01	18	18	27	245	8.16667	2021-11	36	18	0	1	2	0	0	2	80	4	2	2	2	80%	3	0	0	3	0		0		0	0
61	2020-03-10	2021-03-09	12	2021-07-01	16	16	20	123	4.1	2021-11-01	62	4	0	1	1	0	0	2	80	4	2	2	2	40%-60%	3	0	0	3	0		0		0	0
30	2017-07-18	2018-11-01	8	2021-07-14	48	36	48	110	3.66667	2021-11-01	34	36	0	1	2	0	0	1	70	3	2	2	1	60-70%	2	0	0	1	0		0		0	0
34	2013-06-01	2017-06-01	48	2017-11-01	53	5	78	791	26.3667	2020-01-01	38.4167	5	1	0	1	0	0	1	40	3	2	2	1	70%	2	0	0	1	0		0		0	0
46	2010-03-03	2012-07-01	28	2016-11-01	79	52	115	1095	36.5	2019-11-01	52.5833	52	1	0	1	1	1	2	未知	2	1	2	2	20-25%	1	0	1	2	0		1	1	1	0
28	2003-09-01	2014-10-01	132	2014-10-01	133	0	140	212	7.06667	2015-05-01	29.25	0	1	0	1	1	1	1	未知	3	1	1	1	40%	2	0	0	1	0		0		0	0
38	2010-04-01	2012-06-01	26	2017-07-01	87	61	139	1584	52.8	2021-11-01	45.3333	61	0	1	1	1	1	1	5	3	1	2	1	80%	2	0	1	1	0		1	1	1	0
46	2013-12-05	2015-05-01	17	2015-05-01	16	0	74	1766	58.8667	2020-03-01	47.4167	0	1	0	2	1	1	1	60	3	1	1	2	未知	1	1	1	2	0		0		0	1	1
45	2017-06-01	2018-03-01	9	2018-03-01	9	0	22	396	13.2	2019-04-01	45.5833	0	1	0	1	0	0	1	10	3	2	2	1	20%	2	0	0	1	0		0		0	0
54	2008-03-01	2011-03-01	36	2012-06-01	51	15	69	548	18.2667	2013-12-01	58.25	15	1	0	1	1	0	1	10	3	1	2	1	0.25	2	0	0	1	0		0		0	0
27	2010-04-01	2013-02-01	34	2013-06-01	38	4	72	1035	34.5	2016-04-01	30.1667	4	1	0	1	0	0	1	50-75	3	2	2	1	0.5	2	0	0	1	0		0		0	0
47	2014-05-01	2014-05-01	0	2014-05-01	0	0	64	1949	64.9667	2019-09-01	47	0	1	0	1	0	0	1	60	3	2	2	2	未知	3	1	1	1	0		0		0	1	1
52	2013-10-01	2014-04-01	8	2014-04-01	6	0	17	334	11.1333	2015-03-01	52.6667	0	1	0	1	0	0	2	60	4	2	2	2	90%	3	0	0	3	0		0		0	0
50	2015-09-23	2017-06-01	21	2018-10-01	36	16	57	639	21.3	2020-07-01	53.0833	16	1	0	1	0	0	1	30	3	2	2	1	25%	2	0	0	1	0		0		0	0
35	2015-11-02	2016-08-01	9	2016-12-01	12	4	37	761	25.3667	2019-01-01	36.0833	4	1	0	2	0	0	1	50	3	2	2	2	未知	3	1	1	1	0		0		0	1	1
60	2015-01-08	2016-07-01	18	2017-10-01	32	15	49	516	17.2	2019-03-01	62.75	15	1	0	1	0	0	1	75	3	2	2	1	50%	2	0	0	1	0		0		0	0
35	2004-08-01	2005-07-01	10	2010-11-23	75	64	89	426	14.2	2012-01-23	41.1667	52	1	0	1	0	0	1	未知	3	2	2	1	未知	2	0	0	1	0		0		0	0
37	2007-01-08	2012-07-01	64	2012-07-01	65	0	85	608	20.2667	2014-03-01	42.3333	0	1	0	1	0	0	2	1	4	1	2	2	25%	1	1	1	3	1	2	0		1	0
41	2015-10-13	2017-05-01	15	2017-05-01	18	0	22	123	4.1	2017-09-01	42.5833	0	1	0	2	1	1	2	20-30	2	2	2	2	未知	3	1	1	2	1	1	1	1	1	0
33	2004-04-01	2008-04-01	48	2012-04-01	96	48	139	1309	43.6333	2015-11-01	41	48	1	0	2	1	1	1	未知	3	2	2	1	0.25	2	0	1	1	1	1	1	1	1	0
39	2017-12-12	2018-01-01	0	2018-11-01	11	10	47	1122	37.4	2021-11-27	40	2019-4；2019-9；	0	1	2	0	0	1	60	3	2	2	1	70	2	0	0	1	0		0		0	0
43	2019-05-01	2021-01-01	20	2021-01-01	20	0	10	330	11	2021-11-27	45		0	1	1	1	1	1	40	3	1	2	1	80	2	0	1	1	0		1	1	1	0
58	2020-01-07	2021-06-01	17	2021-06-01	17	0	5	179	5.96667	2021-11-27	59		0	1	2	1	0	1	50	3	2	1	1	50	2	0	1	1	1	1	1	2	1	0
